# Supplementary material for: Trends in the epidemiology of cardiovascular disease in the UK
Source: PubMed Central journal article supplement (PMC5256396; doi:10.1136/heartjnl-2016-309573), 2016-08-22
Supplement: heartjnl-2016-309573supp_tables.pdf [file heartjnl-2016-309573supp_tables.pdf]

**Age-standardised death rates per 100,000 from cardiovascular disease (CVD), all ages, United Kingdom and England, Wales, Scotland, Northern Ireland, 1979 to 2013**

| Year        | United Kingdom |       |      | England |       |      | Wales |       |      | Scotland |       |      | Northern Ireland |       |      |
|-------------|----------------|-------|------|---------|-------|------|-------|-------|------|----------|-------|------|------------------|-------|------|
|             | Men            | Women | Both | Men     | Women | Both | Men   | Women | Both | Men      | Women | Both | Men              | Women | Both |
| <b>1979</b> | 1152           | 753   | 914  | 1121    | 733   | 890  | 1229  | 797   | 971  | 1344     | 889   | 1063 | 1435             | 904   | 1115 |
| <b>1981</b> | 1072           | 695   | 848  | 1046    | 678   | 828  | 1137  | 737   | 899  | 1248     | 814   | 982  | 1247             | 786   | 974  |
| <b>1983</b> | 1032           | 664   | 814  | 1008    | 648   | 795  | 1127  | 701   | 872  | 1186     | 778   | 939  | 1142             | 743   | 907  |
| <b>1985</b> | 1014           | 656   | 803  | 994     | 641   | 786  | 1083  | 688   | 848  | 1163     | 763   | 920  | 1062             | 713   | 859  |
| <b>1987</b> | 933            | 600   | 737  | 914     | 585   | 721  | 973   | 618   | 762  | 1097     | 717   | 866  | 991              | 652   | 792  |
| <b>1989</b> | 890            | 578   | 706  | 867     | 562   | 688  | 929   | 608   | 740  | 1076     | 706   | 851  | 963              | 615   | 755  |
| <b>1991</b> | 853            | 554   | 677  | 840     | 543   | 665  | 878   | 563   | 695  | 972      | 653   | 781  | 866              | 565   | 690  |
| <b>1993</b> | 824            | 537   | 656  | 805     | 521   | 639  | 855   | 568   | 691  | 987      | 663   | 795  | 865              | 558   | 686  |
| <b>1995</b> | 753            | 491   | 601  | 737     | 477   | 586  | 799   | 525   | 639  | 868      | 593   | 706  | 811              | 540   | 652  |
| <b>1997</b> | 701            | 461   | 562  | 685     | 449   | 548  | 741   | 486   | 592  | 822      | 559   | 668  | 761              | 492   | 602  |
| <b>1999</b> | 654            | 434   | 527  | 637     | 421   | 513  | 697   | 464   | 565  | 783      | 527   | 632  | 723              | 493   | 588  |
| <b>2001</b> | 613            | 411   | 497  | 603     | 402   | 487  | 657   | 448   | 537  | 684      | 476   | 564  | 648              | 439   | 526  |
| <b>2003</b> | 578            | 398   | 475  | 565     | 390   | 466  | 635   | 425   | 513  | 670      | 457   | 546  | 581              | 404   | 479  |
| <b>2005</b> | 500            | 345   | 413  | 490     | 337   | 404  | 536   | 376   | 447  | 577      | 406   | 480  | 519              | 350   | 421  |
| <b>2007</b> | 443            | 307   | 367  | 432     | 299   | 359  | 473   | 335   | 397  | 527      | 355   | 428  | 477              | 324   | 389  |
| <b>2009</b> | 399            | 277   | 331  | 392     | 271   | 325  | 424   | 300   | 356  | 450      | 316   | 375  | 421              | 295   | 350  |
| <b>2011</b> | 350            | 236   | 286  | 342     | 229   | 279  | 377   | 253   | 308  | 412      | 288   | 343  | 365              | 239   | 294  |
| <b>2013</b> | 333            | 227   | 275  | 325     | 221   | 268  | 377   | 246   | 304  | 392      | 275   | 327  | 336              | 232   | 277  |

Notes: Directly age-standardised to the European Standard Population 2013.

Source: 1969 to 2009: England and Wales, Office for National Statistics (2010) Personal communication.

Scotland; General Register Office (2010) Personal communication.

Northern Ireland, Statistics and Research Agency (2010) Personal communication.

2010 to 2013: England and Wales, Office for National Statistics; Scotland, General Register Office for Scotland; Northern Ireland, Northern Ireland Statistics and Research Agency.

**Age-standardised death rates per 100,000 from coronary heart disease (CHD), all ages, United Kingdom and England, Wales, Scotland, Northern Ireland, 1979 to 2013**

| Year        | United Kingdom |       |      | England |       |      | Wales |       |      | Scotland |       |      | Northern Ireland |       |      |
|-------------|----------------|-------|------|---------|-------|------|-------|-------|------|----------|-------|------|------------------|-------|------|
|             | Men            | Women | Both | Men     | Women | Both | Men   | Women | Both | Men      | Women | Both | Men              | Women | Both |
| <b>1979</b> | 647            | 314   | 448  | 629     | 305   | 436  | 693   | 323   | 470  | 759      | 374   | 522  | 800              | 394   | 559  |
| <b>1981</b> | 626            | 310   | 437  | 611     | 301   | 426  | 664   | 319   | 456  | 722      | 374   | 511  | 747              | 367   | 522  |
| <b>1983</b> | 620            | 305   | 432  | 604     | 297   | 421  | 675   | 315   | 458  | 720      | 364   | 503  | 722              | 355   | 504  |
| <b>1985</b> | 624            | 316   | 441  | 611     | 308   | 431  | 676   | 328   | 467  | 713      | 378   | 509  | 675              | 360   | 490  |
| <b>1987</b> | 581            | 295   | 411  | 567     | 286   | 400  | 615   | 304   | 429  | 696      | 366   | 494  | 637              | 334   | 458  |
| <b>1989</b> | 552            | 287   | 395  | 537     | 278   | 383  | 587   | 303   | 418  | 665      | 360   | 479  | 628              | 327   | 448  |
| <b>1991</b> | 532            | 280   | 382  | 522     | 273   | 374  | 563   | 291   | 402  | 608      | 331   | 440  | 574              | 297   | 409  |
| <b>1993</b> | 510            | 269   | 368  | 498     | 260   | 358  | 548   | 291   | 396  | 599      | 331   | 439  | 552              | 294   | 400  |
| <b>1995</b> | 458            | 238   | 328  | 447     | 231   | 320  | 489   | 252   | 349  | 525      | 288   | 383  | 515              | 288   | 380  |
| <b>1997</b> | 417            | 218   | 300  | 407     | 212   | 292  | 447   | 225   | 315  | 483      | 269   | 355  | 477              | 251   | 344  |
| <b>1999</b> | 383            | 200   | 276  | 372     | 193   | 267  | 418   | 212   | 299  | 460      | 250   | 335  | 442              | 238   | 322  |
| <b>2001</b> | 345            | 180   | 249  | 338     | 174   | 242  | 376   | 200   | 274  | 394      | 222   | 293  | 380              | 209   | 279  |
| <b>2003</b> | 317            | 169   | 231  | 308     | 163   | 225  | 352   | 186   | 255  | 383      | 205   | 278  | 335              | 184   | 246  |
| <b>2005</b> | 275            | 144   | 199  | 266     | 138   | 193  | 307   | 162   | 224  | 332      | 180   | 244  | 312              | 164   | 225  |
| <b>2007</b> | 240            | 124   | 174  | 232     | 120   | 168  | 260   | 140   | 192  | 298      | 152   | 213  | 274              | 143   | 198  |
| <b>2009</b> | 211            | 107   | 152  | 205     | 102   | 147  | 228   | 118   | 167  | 251      | 134   | 183  | 242              | 131   | 178  |
| <b>2011</b> | 188            | 92    | 133  | 182     | 88    | 129  | 209   | 102   | 148  | 225      | 117   | 163  | 213              | 96    | 145  |
| <b>2013</b> | 177            | 86    | 126  | 172     | 83    | 122  | 201   | 97    | 143  | 206      | 108   | 151  | 187              | 95    | 134  |

Notes: Directly age-standardised to the European Standard Population 2013.

Source: 1969 to 2009: England and Wales, Office for National Statistics (2010) Personal communication.

Scotland; General Register Office (2010) Personal communication.

Northern Ireland, Statistics and Research Agency (2010) Personal communication.

2010 to 2013: England and Wales, Office for National Statistics; Scotland, General Register Office for Scotland; Northern Ireland, Northern Ireland Statistics and Research Agency.

**Age-standardised death rates per 100,000 from stroke, all ages, United Kingdom and England, Wales, Scotland, Northern Ireland, 1979 to 2013**

| Year | United Kingdom |       |      | England |       |      | Wales |       |      | Scotland |       |      | Northern Ireland |       |      |
|------|----------------|-------|------|---------|-------|------|-------|-------|------|----------|-------|------|------------------|-------|------|
|      | Men            | Women | Both | Men     | Women | Both | Men   | Women | Both | Men      | Women | Both | Men              | Women | Both |
| 1979 | 254            | 232   | 242  | 243     | 223   | 232  | 274   | 256   | 266  | 335      | 298   | 313  | 341              | 277   | 300  |
| 1981 | 229            | 210   | 219  | 220     | 201   | 210  | 245   | 233   | 241  | 308      | 273   | 287  | 240              | 253   | 252  |
| 1983 | 213            | 199   | 206  | 206     | 191   | 199  | 228   | 214   | 221  | 272      | 255   | 264  | 235              | 238   | 238  |
| 1985 | 224            | 204   | 213  | 219     | 199   | 208  | 228   | 220   | 225  | 272      | 240   | 253  | 223              | 189   | 201  |
| 1987 | 203            | 189   | 196  | 198     | 184   | 191  | 209   | 199   | 205  | 255      | 229   | 240  | 202              | 192   | 198  |
| 1989 | 195            | 179   | 187  | 190     | 174   | 181  | 194   | 187   | 192  | 253      | 228   | 239  | 198              | 184   | 191  |
| 1991 | 192            | 174   | 182  | 189     | 170   | 179  | 194   | 175   | 184  | 232      | 211   | 221  | 172              | 172   | 174  |
| 1993 | 167            | 156   | 162  | 160     | 149   | 154  | 161   | 156   | 161  | 241      | 222   | 231  | 201              | 165   | 180  |
| 1995 | 156            | 147   | 152  | 151     | 141   | 146  | 165   | 153   | 159  | 212      | 201   | 208  | 167              | 158   | 163  |
| 1997 | 149            | 139   | 144  | 144     | 135   | 140  | 153   | 142   | 148  | 196      | 174   | 184  | 167              | 148   | 156  |
| 1999 | 139            | 134   | 137  | 134     | 130   | 133  | 141   | 136   | 140  | 184      | 171   | 177  | 162              | 154   | 157  |
| 2001 | 144            | 134   | 139  | 140     | 130   | 136  | 149   | 141   | 145  | 174      | 162   | 168  | 148              | 136   | 142  |
| 2003 | 139            | 131   | 135  | 135     | 128   | 132  | 153   | 135   | 143  | 170      | 159   | 165  | 142              | 133   | 138  |
| 2005 | 115            | 112   | 115  | 113     | 110   | 112  | 118   | 113   | 117  | 142      | 139   | 142  | 114              | 109   | 112  |
| 2007 | 101            | 99    | 101  | 98      | 96    | 98   | 107   | 102   | 105  | 129      | 121   | 125  | 109              | 108   | 109  |
| 2009 | 91             | 89    | 91   | 89      | 87    | 88   | 95    | 97    | 97   | 110      | 110   | 111  | 91               | 92    | 93   |
| 2011 | 76             | 73    | 75   | 73      | 70    | 72   | 75    | 75    | 76   | 100      | 98    | 100  | 80               | 82    | 82   |
| 2013 | 70             | 68    | 69   | 67      | 65    | 66   | 79    | 71    | 74   | 96       | 92    | 95   | 79               | 75    | 77   |

Notes: Directly age-standardised to the European Standard Population 2013.

Source: 1969 to 2009: England and Wales, Office for National Statistics (2010) Personal communication.

Scotland; General Register Office (2010) Personal communication.

Northern Ireland, Statistics and Research Agency (2010) Personal communication.

2010 to 2013: England and Wales, Office for National Statistics; Scotland, General Register Office for Scotland; Northern Ireland, Northern Ireland Statistics and Research Agency.

**Age-standardised death rates per 100,000 from cardiovascular disease (CVD), under 75, United Kingdom and England, Wales, Scotland, Northern Ireland, 1979 to 2013**

| Year        | United Kingdom |     |     | England |     |     | Wales |     |     | Scotland |     |     | Northern Ireland |     |     |
|-------------|----------------|-----|-----|---------|-----|-----|-------|-----|-----|----------|-----|-----|------------------|-----|-----|
|             |                |     |     |         |     |     |       |     |     |          |     |     |                  |     |     |
| <b>1979</b> | 462            | 211 | 325 | 447     | 201 | 314 | 504   | 230 | 354 | 545      | 275 | 395 | 583              | 279 | 415 |
| <b>1981</b> | 432            | 196 | 304 | 418     | 187 | 293 | 469   | 210 | 328 | 513      | 259 | 373 | 534              | 245 | 375 |
| <b>1983</b> | 417            | 188 | 293 | 404     | 179 | 282 | 464   | 206 | 324 | 498      | 246 | 359 | 495              | 242 | 356 |
| <b>1985</b> | 397            | 179 | 279 | 384     | 170 | 269 | 433   | 194 | 304 | 480      | 241 | 348 | 473              | 228 | 339 |
| <b>1987</b> | 369            | 168 | 261 | 358     | 160 | 251 | 390   | 181 | 278 | 453      | 224 | 327 | 424              | 200 | 301 |
| <b>1989</b> | 342            | 158 | 243 | 329     | 150 | 233 | 363   | 171 | 260 | 433      | 217 | 314 | 404              | 185 | 284 |
| <b>1991</b> | 319            | 147 | 227 | 309     | 141 | 219 | 337   | 150 | 237 | 392      | 196 | 285 | 353              | 168 | 252 |
| <b>1993</b> | 304            | 140 | 217 | 293     | 134 | 209 | 329   | 149 | 233 | 381      | 186 | 275 | 346              | 161 | 245 |
| <b>1995</b> | 274            | 127 | 196 | 265     | 121 | 189 | 294   | 137 | 210 | 336      | 165 | 243 | 315              | 155 | 228 |
| <b>1997</b> | 248            | 117 | 179 | 239     | 112 | 172 | 271   | 129 | 196 | 307      | 153 | 224 | 282              | 129 | 199 |
| <b>1999</b> | 225            | 105 | 162 | 217     | 101 | 156 | 251   | 113 | 178 | 280      | 136 | 202 | 250              | 114 | 177 |
| <b>2001</b> | 199            | 93  | 144 | 194     | 90  | 140 | 219   | 105 | 159 | 240      | 117 | 174 | 201              | 97  | 145 |
| <b>2003</b> | 180            | 84  | 130 | 175     | 81  | 126 | 200   | 93  | 144 | 223      | 106 | 160 | 181              | 79  | 127 |
| <b>2005</b> | 155            | 71  | 111 | 150     | 68  | 108 | 172   | 80  | 124 | 193      | 91  | 139 | 156              | 73  | 112 |
| <b>2007</b> | 137            | 62  | 98  | 132     | 60  | 95  | 146   | 70  | 107 | 179      | 82  | 128 | 141              | 63  | 100 |
| <b>2009</b> | 122            | 54  | 87  | 118     | 52  | 84  | 134   | 63  | 97  | 148      | 71  | 108 | 122              | 60  | 90  |
| <b>2011</b> | 108            | 47  | 76  | 104     | 45  | 73  | 117   | 56  | 86  | 137      | 63  | 98  | 114              | 46  | 79  |
| <b>2013</b> | 101            | 45  | 72  | 98      | 43  | 70  | 113   | 51  | 81  | 127      | 60  | 92  | 99               | 45  | 71  |

Notes: Directly age-standardised to the European Standard Population 2013.

Source: 1969 to 2009: England and Wales, Office for National Statistics (2010) Personal communication.

Scotland; General Register Office (2010) Personal communication.

Northern Ireland, Statistics and Research Agency (2010) Personal communication.

2010 to 2013: England and Wales, Office for National Statistics; Scotland, General Register Office for Scotland; Northern Ireland, Northern Ireland Statistics and Research Agency.

**Age-standardised death rates per 100,000 from coronary heart disease (CHD), under 75, United Kingdom and England, Wales, Scotland, Northern Ireland, 1979 to 2013**

| Year | United Kingdom |       |      | England |       |      | Wales |       |      | Scotland |       |      | Northern Ireland |       |      |
|------|----------------|-------|------|---------|-------|------|-------|-------|------|----------|-------|------|------------------|-------|------|
|      | Men            | Women | Both | Men     | Women | Both | Men   | Women | Both | Men      | Women | Both | Men              | Women | Both |
| 1979 | 319            | 111   | 206  | 308     | 104   | 198  | 345   | 120   | 222  | 384      | 149   | 254  | 403              | 155   | 267  |
| 1981 | 304            | 107   | 197  | 294     | 101   | 190  | 324   | 111   | 208  | 368      | 148   | 247  | 388              | 147   | 256  |
| 1983 | 298            | 105   | 194  | 287     | 99    | 186  | 332   | 111   | 212  | 365      | 146   | 244  | 366              | 138   | 241  |
| 1985 | 290            | 105   | 190  | 280     | 99    | 183  | 319   | 113   | 208  | 353      | 147   | 239  | 347              | 135   | 231  |
| 1987 | 271            | 100   | 179  | 261     | 95    | 172  | 288   | 108   | 192  | 338      | 140   | 229  | 319              | 124   | 212  |
| 1989 | 247            | 95    | 165  | 238     | 89    | 158  | 266   | 101   | 178  | 314      | 133   | 214  | 298              | 115   | 198  |
| 1991 | 230            | 88    | 154  | 222     | 84    | 149  | 246   | 90    | 163  | 284      | 120   | 194  | 265              | 102   | 176  |
| 1993 | 217            | 81    | 145  | 208     | 77    | 139  | 237   | 89    | 158  | 274      | 112   | 186  | 254              | 102   | 171  |
| 1995 | 190            | 71    | 127  | 183     | 67    | 121  | 209   | 74    | 137  | 236      | 96    | 160  | 232              | 95    | 157  |
| 1997 | 168            | 63    | 113  | 162     | 60    | 108  | 184   | 69    | 124  | 210      | 86    | 143  | 204              | 75    | 134  |
| 1999 | 151            | 55    | 100  | 144     | 52    | 96   | 171   | 58    | 112  | 193      | 75    | 130  | 178              | 64    | 117  |
| 2001 | 131            | 48    | 87   | 127     | 45    | 84   | 148   | 55    | 99   | 159      | 63    | 108  | 139              | 54    | 94   |
| 2003 | 116            | 41    | 77   | 112     | 39    | 74   | 127   | 46    | 85   | 149      | 56    | 99   | 119              | 41    | 77   |
| 2005 | 99             | 34    | 65   | 95      | 31    | 62   | 111   | 38    | 73   | 130      | 48    | 86   | 106              | 39    | 71   |
| 2007 | 86             | 28    | 56   | 82      | 27    | 53   | 90    | 32    | 60   | 117      | 42    | 77   | 97               | 32    | 63   |
| 2009 | 75             | 24    | 48   | 72      | 22    | 46   | 84    | 27    | 55   | 95       | 35    | 63   | 81               | 30    | 54   |
| 2011 | 66             | 21    | 43   | 63      | 19    | 41   | 71    | 24    | 47   | 87       | 29    | 56   | 75               | 22    | 48   |
| 2013 | 62             | 19    | 40   | 60      | 18    | 38   | 72    | 23    | 47   | 80       | 26    | 52   | 65               | 20    | 42   |

Notes: Directly age-standardised to the European Standard Population 2013.

Source: 1969 to 2009: England and Wales, Office for National Statistics (2010) Personal communication.

Scotland; General Register Office (2010) Personal communication.

Northern Ireland, Statistics and Research Agency (2010) Personal communication.

2010 to 2013: England and Wales, Office for National Statistics; Scotland, General Register Office for Scotland; Northern Ireland, Northern Ireland Statistics and Research Agency.

**Age-standardised death rates per 100,000 from stroke, under 75, United Kingdom and England, Wales, Scotland, Northern Ireland, 1979 to 2013**

| Year | United Kingdom |       |      | England |       |      | Wales |       |      | Scotland |       |      | Northern Ireland |       |      |
|------|----------------|-------|------|---------|-------|------|-------|-------|------|----------|-------|------|------------------|-------|------|
|      | Men            | Women | Both | Men     | Women | Both | Men   | Women | Both | Men      | Women | Both | Men              | Women | Both |
| 1979 | 76             | 57    | 66   | 72      | 54    | 62   | 85    | 64    | 73   | 102      | 79    | 89   | 96               | 74    | 84   |
| 1981 | 67             | 51    | 58   | 64      | 48    | 55   | 76    | 57    | 65   | 92       | 73    | 81   | 76               | 59    | 67   |
| 1983 | 62             | 48    | 54   | 60      | 45    | 52   | 68    | 53    | 60   | 83       | 66    | 73   | 72               | 69    | 71   |
| 1985 | 61             | 46    | 52   | 58      | 44    | 50   | 65    | 51    | 58   | 81       | 62    | 70   | 69               | 54    | 60   |
| 1987 | 55             | 42    | 48   | 53      | 40    | 46   | 56    | 45    | 50   | 73       | 54    | 62   | 58               | 43    | 50   |
| 1989 | 51             | 39    | 45   | 49      | 37    | 42   | 51    | 44    | 47   | 72       | 55    | 63   | 60               | 43    | 51   |
| 1991 | 49             | 36    | 42   | 47      | 34    | 40   | 53    | 36    | 44   | 65       | 48    | 55   | 48               | 42    | 45   |
| 1993 | 42             | 32    | 37   | 40      | 30    | 35   | 41    | 32    | 36   | 62       | 47    | 54   | 46               | 33    | 39   |
| 1995 | 40             | 30    | 35   | 38      | 29    | 33   | 40    | 31    | 35   | 58       | 42    | 49   | 42               | 35    | 38   |
| 1997 | 37             | 28    | 32   | 36      | 27    | 31   | 41    | 30    | 35   | 49       | 36    | 42   | 43               | 30    | 36   |
| 1999 | 34             | 26    | 30   | 33      | 25    | 29   | 37    | 27    | 31   | 43       | 34    | 38   | 40               | 29    | 34   |
| 2001 | 32             | 24    | 28   | 31      | 23    | 27   | 31    | 25    | 28   | 40       | 31    | 35   | 28               | 23    | 25   |
| 2003 | 29             | 22    | 26   | 28      | 21    | 25   | 32    | 25    | 28   | 38       | 28    | 32   | 30               | 19    | 24   |
| 2005 | 24             | 19    | 21   | 24      | 18    | 21   | 26    | 20    | 23   | 30       | 24    | 27   | 24               | 16    | 20   |
| 2007 | 21             | 16    | 18   | 20      | 15    | 18   | 23    | 18    | 21   | 29       | 20    | 24   | 19               | 18    | 18   |
| 2009 | 18             | 14    | 16   | 18      | 13    | 15   | 18    | 16    | 17   | 25       | 20    | 22   | 18               | 14    | 16   |
| 2011 | 17             | 12    | 14   | 16      | 12    | 14   | 18    | 15    | 16   | 24       | 16    | 20   | 18               | 13    | 15   |
| 2013 | 15             | 11    | 13   | 15      | 11    | 12   | 16    | 11    | 14   | 21       | 17    | 19   | 14               | 12    | 13   |

Notes: Directly age-standardised to the European Standard Population 2013.

Source: 1969 to 2009: England and Wales, Office for National Statistics (2010) Personal communication.

Scotland; General Register Office (2010) Personal communication.

Northern Ireland, Statistics and Research Agency (2010) Personal communication.

2010 to 2013: England and Wales, Office for National Statistics; Scotland, General Register Office for Scotland; Northern Ireland, Northern Ireland Statistics and Research Agency.

**Prevalence of cardiovascular conditions in men by age, Great Britain 1988-2011**

|                       |                 | 1988       | 1989       | 1994       | 1995       | 1996       | 1998        | 2000        | 2001        | 2002        | 2003        | 2004        | 2005        | 2006        | 2007        | 2008        | 2009        | 2010        | 2011        |
|-----------------------|-----------------|------------|------------|------------|------------|------------|-------------|-------------|-------------|-------------|-------------|-------------|-------------|-------------|-------------|-------------|-------------|-------------|-------------|
|                       |                 | %          | %          | %          | %          | %          | %           | %           | %           | %           | %           | %           | %           | %           | %           | %           | %           | %           | %           |
| Myocardial infarction | 16-44           | 0.2        | 0.2        | 0.1        | 0.1        | 0.1        | 0.3         | 0.1         | 0.1         | 0.1         | 0.2         | 0.0         | 0.1         | 0.2         | 0.0         | *           | 0.2         | 0.2         | 0.1         |
|                       | 45-64           | 4.7        | 4.6        | 3.1        | 3.4        | 3.0        | 4.0         | 3.1         | 3.2         | 2.6         | 2.2         | 2.6         | 3.0         | 2.4         | 2.2         | 2.2         | 2.1         | 2.1         | 1.9         |
|                       | 65-74           | 7.5        | 10.0       | 6.6        | 9.2        | 6.6        | 8.9         | 8.6         | 7.5         | 7.0         | 8.7         | 8.4         | 6.2         | 6.4         | 6.5         | 5.4         | 5.8         | 5.8         | 4.7         |
|                       | 75+             | 8.2        | 7.9        | 8.1        | 5.4        | 7.5        | 11.1        | 9.4         | 11.3        | 11.8        | 8.0         | 8.3         | 6.5         | 7.2         | 5.7         | 5.8         | 6.3         | 6.3         | 7.2         |
|                       | <b>All Ages</b> | <b>2.2</b> | <b>2.3</b> | <b>2.3</b> | <b>2.5</b> | <b>2.3</b> | <b>3.2</b>  | <b>2.5</b>  | <b>2.5</b>  | <b>2.4</b>  | <b>2.3</b>  | <b>2.3</b>  | <b>2.1</b>  | <b>2.0</b>  | <b>1.8</b>  | <b>1.7</b>  | <b>1.9</b>  | <b>1.9</b>  | <b>1.7</b>  |
| Stroke                | 16-44           | 0.0        | 0.0        | 0.1        | 0.0        | 0.1        | 0.1         | 0.1         | 0.2         | 0.1         | 0.1         | 0.1         | 0.1         | 0.1         | 0.0         | 0.1         | *           | *           | 0.1         |
|                       | 45-64           | 1.0        | 1.0        | 1.0        | 0.6        | 0.9        | 0.8         | 1.1         | 1.1         | 0.8         | 0.9         | 0.8         | 1.0         | 0.7         | 0.8         | 0.6         | 0.8         | 0.8         | 0.8         |
|                       | 65-74           | 3.9        | 3.0        | 3.0        | 2.0        | 2.7        | 2.6         | 3.6         | 1.8         | 2.6         | 2.0         | 1.7         | 1.8         | 3.2         | 2.8         | 2.4         | 2.3         | 2.3         | 1.7         |
|                       | 75+             | 3.8        | 4.8        | 3.7        | 3.1        | 4.3        | 3.0         | 3.6         | 2.3         | 3.9         | 3.7         | 5.4         | 3.5         | 3.5         | 3.8         | 3.3         | 3.1         | 3.1         | 2.6         |
|                       | <b>All Ages</b> | <b>0.8</b> | <b>0.7</b> | <b>0.9</b> | <b>0.6</b> | <b>1.0</b> | <b>0.8</b>  | <b>1.0</b>  | <b>0.8</b>  | <b>0.9</b>  | <b>0.8</b>  | <b>0.8</b>  | <b>0.8</b>  | <b>0.9</b>  | <b>0.8</b>  | <b>0.7</b>  | <b>0.7</b>  | <b>0.7</b>  | <b>0.7</b>  |
| CVD                   | 16-44           | 1.7        | 1.2        | 1.6        | 1.2        | 1.4        | 1.9         | 1.8         | 2.2         | 1.7         | 1.7         | 1.4         | 1.5         | 1.3         | 1.0         | 1.4         | 1.6         | 1.5         | 1.5         |
|                       | 45-64           | 14.3       | 13.3       | 13.8       | 12.9       | 14.1       | 15.5        | 13.7        | 15.0        | 15.2        | 14.7        | 14.6        | 16.7        | 15.9        | 14.7        | 15.6        | 14.9        | 14.6        | 14.6        |
|                       | 65-74           | 24.7       | 25.9       | 24.6       | 27.2       | 26.8       | 28.1        | 29.0        | 31.3        | 33.0        | 34.5        | 29.5        | 28.8        | 35.5        | 32.0        | 31.2        | 32.2        | 33.9        | 28.5        |
|                       | 75+             | 22.3       | 22.1       | 23.6       | 23.8       | 24.9       | 31.0        | 30.8        | 33.3        | 39.8        | 31.7        | 37.3        | 32.9        | 38.4        | 33.8        | 31.1        | 33.7        | 35.5        | 34.1        |
|                       | <b>All Ages</b> | <b>7.3</b> | <b>6.9</b> | <b>9.3</b> | <b>9.3</b> | <b>9.9</b> | <b>11.3</b> | <b>10.7</b> | <b>11.0</b> | <b>11.9</b> | <b>11.3</b> | <b>11.1</b> | <b>11.4</b> | <b>12.0</b> | <b>10.9</b> | <b>11.1</b> | <b>11.4</b> | <b>11.7</b> | <b>11.1</b> |

Notes: \* Information is suppressed for low cell count as a measure of disclosure control.

Source: Office for National Statistics (2006) 2005 General Household Survey.  
Office for National Statistics (2007-2012) General Lifestyle Survey 2006-2011.

**Prevalence of cardiovascular conditions in women by age, Great Britain 1988-2011**

|                       |                 | 1988       | 1989       | 1994       | 1995       | 1996       | 1998       | 2000        | 2001        | 2002        | 2003        | 2004        | 2005        | 2006        | 2007       | 2008       | 2009       | 2010        | 2011       |
|-----------------------|-----------------|------------|------------|------------|------------|------------|------------|-------------|-------------|-------------|-------------|-------------|-------------|-------------|------------|------------|------------|-------------|------------|
|                       |                 | %          | %          | %          | %          | %          | %          | %           | %           | %           | %           | %           | %           | %           | %          | %          | %          | %           | %          |
| Myocardial infarction | 16-44           | 0.1        | 0.1        | 0.1        | 0.1        | 0.1        | 0.0        | 0.1         | 0.0         | 0.0         | 0.1         | 0.0         | 0.0         | 0.1         | 0.1        | *          | 0.1        | 0.1         | 0.1        |
|                       | 45-64           | 2.0        | 2.4        | 2.0        | 1.7        | 2.8        | 1.8        | 1.8         | 1.6         | 1.5         | 1.3         | 1.8         | 1.4         | 1.2         | 0.8        | 0.8        | 0.9        | 0.7         | 0.8        |
|                       | 65-74           | 6.7        | 6.4        | 5.9        | 4.5        | 6.5        | 6.5        | 5.4         | 3.9         | 5.8         | 6.3         | 5.1         | 4.8         | 3.9         | 2.6        | 2.6        | 2.9        | 3.1         | 3.1        |
|                       | 75+             | 6.6        | 6.5        | 7.3        | 7.3        | 8.3        | 8.6        | 7.8         | 5.3         | 9.0         | 5.2         | 6.7         | 7.0         | 6.5         | 5.1        | 4.5        | 4.9        | 4.6         | 3.7        |
|                       | <b>All Ages</b> | <b>1.7</b> | <b>1.7</b> | <b>2.1</b> | <b>1.8</b> | <b>2.4</b> | <b>2.2</b> | <b>2.0</b>  | <b>1.5</b>  | <b>2.0</b>  | <b>1.7</b>  | <b>1.8</b>  | <b>1.7</b>  | <b>1.5</b>  | <b>1.1</b> | <b>1.0</b> | <b>1.2</b> | <b>1.1</b>  | <b>1.0</b> |
| Stroke                | 16-44           | 0.1        | 0.1        | 0.2        | 0.0        | 0.0        | 0.1        | 0.1         | 0.0         | 0.1         | 0.0         | 0.0         | 0.1         | 0.1         | 0.1        | *          | 0.1        | 0.1         | 0.1        |
|                       | 45-64           | 0.4        | 0.4        | 0.5        | 0.5        | 0.5        | 0.5        | 0.7         | 0.7         | 0.8         | 0.4         | 0.5         | 0.4         | 0.5         | 0.5        | 0.6        | 0.4        | 0.7         | 0.3        |
|                       | 65-74           | 2.4        | 1.5        | 1.8        | 1.9        | 1.7        | 1.5        | 1.7         | 2.0         | 2.2         | 1.9         | 1.2         | 1.5         | 1.7         | 1.2        | 1.6        | 1.3        | 1.4         | 1.2        |
|                       | 75+             | 3.0        | 4.0        | 3.6        | 3.5        | 2.2        | 4.1        | 3.3         | 3.9         | 3.7         | 2.6         | 2.8         | 3.0         | 2.1         | 1.9        | 2.7        | 2.1        | 1.8         | 1.4        |
|                       | <b>All Ages</b> | <b>0.6</b> | <b>0.6</b> | <b>0.8</b> | <b>0.7</b> | <b>0.6</b> | <b>0.8</b> | <b>0.8</b>  | <b>0.9</b>  | <b>0.9</b>  | <b>0.6</b>  | <b>0.6</b>  | <b>0.6</b>  | <b>0.6</b>  | <b>0.5</b> | <b>0.6</b> | <b>0.5</b> | <b>0.6</b>  | <b>0.4</b> |
| CVD                   | 16-44           | 1.7        | 2.2        | 1.7        | 1.3        | 1.5        | 1.3        | 1.8         | 1.5         | 1.9         | 2.2         | 1.7         | 2.0         | 2.3         | 1.8        | 1.2        | 1.7        | 2.1         | 1.9        |
|                       | 45-64           | 10.8       | 11.5       | 10.6       | 9.7        | 12.4       | 10.6       | 11.7        | 11.5        | 12.9        | 11.8        | 13.2        | 12.3        | 12.8        | 11.0       | 9.9        | 9.8        | 10.6        | 8.4        |
|                       | 65-74           | 22.8       | 22.0       | 23.9       | 19.7       | 22.4       | 26.8       | 26.2        | 25.2        | 29.1        | 29.7        | 26.6        | 26.0        | 29.0        | 23.9       | 23.0       | 26.2       | 22.3        | 22.5       |
|                       | 75+             | 26.5       | 26.8       | 25.1       | 29.2       | 25.4       | 29.9       | 30.6        | 32.2        | 37.9        | 30.3        | 31.9        | 31.3        | 33.3        | 27.7       | 32.5       | 27.5       | 31.7        | 29.8       |
|                       | <b>All Ages</b> | <b>7.7</b> | <b>7.7</b> | <b>9.2</b> | <b>8.7</b> | <b>9.5</b> | <b>9.9</b> | <b>10.4</b> | <b>10.2</b> | <b>11.9</b> | <b>10.9</b> | <b>11.0</b> | <b>10.8</b> | <b>11.5</b> | <b>9.7</b> | <b>9.4</b> | <b>9.5</b> | <b>10.1</b> | <b>9.1</b> |

Notes: \* Information is suppressed for low cell count as a measure of disclosure control.

Source: Office for National Statistics (2006) 2005 General Household Survey.  
Office for National Statistics (2007-2012) General Lifestyle Survey 2006-2011.



## Prevalence of selected heart conditions by gender, from the health surveys of England, Scotland and Wales 2003 to 2014

|                               |                   | 2003       | 2006       | 2007       | 2008       | 2009       | 2010       | 2011       | 2012       | 2013       | 2014       |
|-------------------------------|-------------------|------------|------------|------------|------------|------------|------------|------------|------------|------------|------------|
|                               |                   | %          |            | %          | %          | %          | %          | %          | %          | %          | %          |
| <b>Coronary Heart Disease</b> |                   |            |            |            |            |            |            |            |            |            |            |
| England                       | Men               | 6.4        | 6.5        |            |            |            |            | 5.7        |            |            |            |
|                               | Women             | 4.1        | 4.0        |            |            |            |            | 3.5        |            |            |            |
|                               | <b>All adults</b> | <b>5.2</b> | <b>5.2</b> |            |            |            |            | <b>4.6</b> |            |            |            |
| Scotland                      | Men               | 8.2        |            |            | 6.9        | 7.4        | 7.5        | 7.5        | 7.3        | 7.1        |            |
|                               | Women             | 6.5        |            |            | 5.6        | 5.2        | 5.2        | 4.9        | 5.7        | 5.3        |            |
|                               | <b>All adults</b> | <b>7.3</b> |            |            | <b>6.2</b> | <b>6.2</b> | <b>6.3</b> | <b>6.2</b> | <b>6.5</b> | <b>6.1</b> |            |
| <b>Myocardial infarction</b>  |                   |            |            |            |            |            |            |            |            |            |            |
| England                       | Men               | 3.8        | 4.1        |            |            |            |            | 3.7        |            |            |            |
|                               | Women             | 1.7        | 1.7        |            |            |            |            | 1.6        |            |            |            |
|                               | <b>All adults</b> | <b>-</b>   | <b>2.9</b> |            |            |            |            | <b>2.6</b> |            |            |            |
| Wales                         | Men               | 6.0        |            | 6.0        | 6.0        | 5.0        | 5.0        | 5.1        | 5.1        | 5.0        | 4.6        |
|                               | Women             | 3.0        |            | 3.0        | 2.0        | 3.0        | 2.6        | 2.5        | 2.6        | 2.3        | 2.4        |
|                               | <b>All adults</b> | <b>5.0</b> |            | <b>4.0</b> | <b>4.0</b> | <b>4.0</b> | <b>3.8</b> | <b>3.8</b> | <b>3.8</b> | <b>3.6</b> | <b>3.5</b> |
| <b>Stroke</b>                 |                   |            |            |            |            |            |            |            |            |            |            |
| England                       | Men               | 2.4        | 2.4        |            |            |            |            | 2.7        |            |            |            |
|                               | Women             | 2.2        | 2.2        |            |            |            |            | 2.1        |            |            |            |
|                               | <b>All adults</b> | <b>2.3</b> | <b>2.3</b> |            |            |            |            | <b>2.4</b> |            |            |            |
| Scotland                      | Men               | 2.4        |            |            | 2.5        | 2.7        | 3.3        | 2.9        | 2.8        | 3.2        |            |
|                               | Women             | 2.1        |            |            | 2.8        | 2.2        | 2.5        | 2.7        | 2.8        | 2.7        |            |
|                               | <b>All adults</b> | <b>2.2</b> |            |            | <b>2.6</b> | <b>2.5</b> | <b>2.9</b> | <b>2.8</b> | <b>2.8</b> | <b>2.9</b> |            |

### Cardiovascular Diseases

|                            |                   |             |  |             |             |             |             |             |             |             |            |
|----------------------------|-------------------|-------------|--|-------------|-------------|-------------|-------------|-------------|-------------|-------------|------------|
| England                    | Men               | 13.6        |  | 13.6        |             |             |             |             |             | 13.9        |            |
|                            | Women             | 13.0        |  | 13.0        |             |             |             |             |             | 13.4        |            |
|                            | <b>All adults</b> |             |  | <b>13.3</b> |             |             |             |             |             | <b>13.6</b> |            |
| Scotland                   | Men               | 14.9        |  |             | 15.1        | 15.2        | 16.3        | 15.6        | 16.6        | 15.7        |            |
|                            | Women             | 14.5        |  |             | 15.5        | 13.7        | 14.0        | 13.8        | 15.9        | 15.3        |            |
|                            | <b>All adults</b> | <b>14.7</b> |  |             | <b>15.3</b> | <b>14.4</b> | <b>15.1</b> | <b>14.6</b> | <b>16.2</b> | <b>15.5</b> |            |
| <b>Any heart condition</b> |                   |             |  |             |             |             |             |             |             |             |            |
| Wales                      | Men               | 11.0        |  | 11.0        | 10.0        | 10.0        | 9.5         | 9.7         | 9.9         | 9.9         | 9.6        |
|                            | Women             | 9.0         |  | 8.0         | 8.0         | 8.0         | 7.3         | 7.6         | 7.6         | 7.0         | 7.5        |
|                            | <b>All adults</b> | <b>10.0</b> |  | <b>9.0</b>  | <b>9.0</b>  | <b>9.0</b>  | <b>8.4</b>  | <b>8.6</b>  | <b>8.7</b>  | <b>8.4</b>  | <b>8.5</b> |

Notes: Adults aged 16 years and over.

England - Data have been weighted for non-response. Copyright © 2014, Re-used with the permission of The Health and Social Care Information Centre. All rights reserved.

Source: Health & Social Care Information Centre. (2014). Health Survey for England 2013, Trend Tables. [www.hscic.gov.uk](http://www.hscic.gov.uk) (accessed June 2015).

The Scottish Government (2014). The Scottish Health Survey 2013. <http://www.gov.scot/Publications/2014/12/9982> (accessed June 2015).

The Welsh Government. Welsh Health Surveys: 2003/04-2014. <http://gov.wales/statistics-and-research/welsh-health-survey/?tab=previous&lang=en> (accessed September 2015).

***Inpatient episodes by main diagnosis in National Health Service hospitals in men, England, Scotland, Wales, Northern Ireland and United Kingdom, 2005/06-2013/14***

|                       |                                                               | 2005/06 | 2006/07 | 2007/08 | 2008/09 | 2009/10 | 2010/11        | 2011/12        | 2012/13        | 2013/14        |
|-----------------------|---------------------------------------------------------------|---------|---------|---------|---------|---------|----------------|----------------|----------------|----------------|
| England               | All diseases of the circulatory system (CVD) (I00-I99)        | 694,974 | 705,822 | 715,200 | 741,384 | 759,672 | 767,889        | 779,921        | 777,888        | 793,952        |
|                       | Coronary heart disease (I20-I25)                              | 274,816 | 276,900 | 275,069 | 274,163 | 265,667 | 263,538        | 266,954        | 265,102        | 264,934        |
|                       | Stroke (I60-I69)                                              | 85,041  | 84,271  | 86,372  | 91,363  | 97,878  | 96,364         | 95,294         | 96,502         | 97,593         |
|                       | Other cardiovascular disease                                  | 335,117 | 344,651 | 353,759 | 375,858 | 396,127 | 407,987        | 417,673        | 416,284        | 431,425        |
| Scotland              | All diseases of the circulatory system (CVD) (I00-I99)        |         |         |         |         | 80,575  | 83,336         | 83,040         | 83,723         | 87,460         |
|                       | Coronary heart disease (I20-I25)                              |         |         |         |         | 30,871  | 32,357         | 31,154         | 31,154         | 31,695         |
|                       | Stroke (I60-I69)                                              |         |         |         |         | 10,898  | 10,965         | 10,864         | 11,565         | 9,430          |
|                       | Other cardiovascular disease                                  |         |         |         |         | 38,806  | 40,014         | 41,022         | 41,004         | 46,335         |
| Wales                 | All diseases of the circulatory system (CVD) (I00-I99)        | 40,598  | 41,128  | 41,525  | 43,120  | 44,510  | 44,492         | 42,800         | 45,446         | 49,671         |
|                       | Coronary heart disease (I20-I25)                              | 15,153  | 15,597  | 15,821  | 15,946  | 15,915  | 15,621         | 15,240         | 15,745         | 16,806         |
|                       | Stroke (I60-I69)                                              | 5,461   | 5,460   | 5,304   | 5,715   | 5,827   | 6,045          | 5,389          | 5,672          | 6,617          |
|                       | Other cardiovascular disease                                  | 19,984  | 20,071  | 20,400  | 21,459  | 22,768  | 22,826         | 22,171         | 24,029         | 26,248         |
| Northern Ireland      | All diseases of the circulatory system (CVD) (I00-I99)        |         |         |         |         |         | 24,499         | 26,591         | 24,154         | 25,674         |
|                       | Coronary heart disease (I20-I25)                              |         |         |         |         |         | 9,800          | 9,521          | 9,846          | 10,697         |
|                       | Stroke (I60-I69)                                              |         |         |         |         |         | 2,485          | 1,628          | 1,437          | 1,742          |
|                       | Other cardiovascular disease                                  |         |         |         |         |         | 12,214         | 15,442         | 12,871         | 13,235         |
| <b>United Kingdom</b> | <b>All diseases of the circulatory system (CVD) (I00-I99)</b> |         |         |         |         |         | <b>920,216</b> | <b>932,352</b> | <b>931,211</b> | <b>956,757</b> |
|                       | Coronary heart disease (I20-I25)                              |         |         |         |         |         | 321,316        | 322,869        | 321,847        | 324,132        |
|                       | Stroke (I60-I69)                                              |         |         |         |         |         | 115,859        | 113,175        | 115,176        | 115,382        |
|                       | Other cardiovascular disease                                  |         |         |         |         |         | 483,041        | 496,308        | 494,188        | 517,243        |

***Inpatient episodes by main diagnosis in National Health Service hospitals in women, England, Scotland, Wales, Northern Ireland and United Kingdom, 2005/06-2013/14***

|                       |                                                               | 2005/06 | 2006/07 | 2007/08 | 2008/09 | 2009/10 | 2010/11        | 2011/12        | 2012/13        | 2013/14        |
|-----------------------|---------------------------------------------------------------|---------|---------|---------|---------|---------|----------------|----------------|----------------|----------------|
| England               | All diseases of the circulatory system (CVD) (I00-I99)        | 549,030 | 549,768 | 559,474 | 580,911 | 598,575 | 603,920        | 601,714        | 596,206        | 607,280        |
|                       | Coronary heart disease (I20-I25)                              | 153,446 | 151,013 | 149,178 | 148,171 | 142,008 | 141,558        | 142,554        | 138,987        | 136,073        |
|                       | Stroke (I60-I69)                                              | 93,280  | 92,181  | 93,627  | 98,738  | 105,827 | 101,971        | 99,142         | 99,579         | 99,763         |
|                       | Other cardiovascular disease                                  | 302,304 | 306,574 | 316,669 | 334,002 | 350,740 | 360,391        | 360,018        | 357,640        | 371,444        |
| Scotland              | All diseases of the circulatory system (CVD) (I00-I99)        |         |         |         |         | 64,325  | 65,696         | 65,699         | 65,043         | 69,838         |
|                       | Coronary heart disease (I20-I25)                              |         |         |         |         | 17,052  | 17,800         | 17,545         | 16,486         | 17,920         |
|                       | Stroke (I60-I69)                                              |         |         |         |         | 11,543  | 11,674         | 11,798         | 12,172         | 9,827          |
|                       | Other cardiovascular disease                                  |         |         |         |         | 35,730  | 36,222         | 36,356         | 36,385         | 42,091         |
| Wales                 | All diseases of the circulatory system (CVD) (I00-I99)        | 34,220  | 34,207  | 34,456  | 35,594  | 37,089  | 36,410         | 34,789         | 35,507         | 38,434         |
|                       | Coronary heart disease (I20-I25)                              | 9,357   | 9,461   | 9,335   | 9,128   | 8,978   | 8,679          | 8,664          | 8,590          | 8,841          |
|                       | Stroke (I60-I69)                                              | 6,199   | 5,683   | 5,884   | 6,598   | 6,584   | 6,426          | 6,071          | 6,408          | 6,648          |
|                       | Other cardiovascular disease                                  | 18,664  | 19,063  | 19,237  | 19,868  | 21,527  | 21,305         | 20,054         | 20,509         | 22,945         |
| Northern Ireland      | All diseases of the circulatory system (CVD) (I00-I99)        |         |         |         |         |         | 18,388         | 20,026         | 18,721         | 18,622         |
|                       | Coronary heart disease (I20-I25)                              |         |         |         |         |         | 4,609          | 4,539          | 4,674          | 4,681          |
|                       | Stroke (I60-I69)                                              |         |         |         |         |         | 2,387          | 1,571          | 1,506          | 1,641          |
|                       | Other cardiovascular disease                                  |         |         |         |         |         | 11,392         | 13,916         | 12,541         | 12,300         |
| <b>United Kingdom</b> | <b>All diseases of the circulatory system (CVD) (I00-I99)</b> |         |         |         |         |         | <b>724,414</b> | <b>722,228</b> | <b>715,477</b> | <b>734,174</b> |
|                       | Coronary heart disease (I20-I25)                              |         |         |         |         |         | 172,646        | 173,302        | 168,737        | 167,515        |
|                       | Stroke (I60-I69)                                              |         |         |         |         |         | 122,458        | 118,582        | 119,665        | 117,879        |
|                       | Other cardiovascular disease                                  |         |         |         |         |         | 429,310        | 430,344        | 427,075        | 448,780        |

Notes: Finished consultant episodes; ordinary admissions and day cases combined. Pregnancy cases not included. ICD-10 codes in parentheses.

Source: Department of Health (2014). Hospital Episode Statistics 2013/14. [www.hesonline.nhs.uk](http://www.hesonline.nhs.uk) (accessed April 2015).

*Information Services Division Scotland (2014) Main diagnosis discharges from hospital 2013/14. [www.isdscotland.org](http://www.isdscotland.org) (accessed April 2015). Personal correspondence.*

*NHS Wales Informatics Service (2014). The Patient Episode Database for Wales- 2013/14. [www.infoandstats.wales.nhs.uk](http://www.infoandstats.wales.nhs.uk) (accessed April 2015). Hospital Information Branch (2014). Northern Ireland Episode Based Acute Inpatient and Day Case Activity Data (2013/14) [www.dhsspsni.gov.uk](http://www.dhsspsni.gov.uk) (accessed April 2015). Personal correspondence.*

## Inpatient episodes by main diagnosis in National Health Service hospitals in men, England 2000/01 to 2013/14

|                | 0 to 4 | 5 to 9 | 10 to 14 | 15 to 19 | 20 to 24 | 25 to 29 | 30 to 34 | 35 to 39 | 40 to 44 | 45 to 49 | 50 to 54 | 55 to 59 | 60 to 64 | 65 to 69 | 70 to 74 | 75 to 79 | 80 to 84 | 85 to 89 | 90+    | All ages       |
|----------------|--------|--------|----------|----------|----------|----------|----------|----------|----------|----------|----------|----------|----------|----------|----------|----------|----------|----------|--------|----------------|
| <b>CVD</b>     |        |        |          |          |          |          |          |          |          |          |          |          |          |          |          |          |          |          |        |                |
| <b>2000/01</b> | 1,056  | 1,313  | 974      | 1,573    | 2,366    | 4,193    | 7,133    | 11,114   | 16,383   | 24,024   | 38,272   | 46,408   | 57,723   | 64,613   | 65,150   | 58,654   | 36,360   | 20,430   | 7,219  | <b>464,958</b> |
| <b>2001/02</b> | 1,077  | 1,328  | 927      | 1,577    | 2,434    | 4,231    | 7,130    | 11,128   | 16,677   | 23,815   | 37,220   | 47,499   | 56,029   | 63,518   | 64,915   | 57,621   | 38,059   | 20,782   | 7,691  | <b>463,658</b> |
| <b>2002/03</b> | 1,036  | 1,313  | 944      | 1,785    | 2,734    | 4,340    | 7,558    | 11,699   | 17,600   | 24,987   | 36,661   | 50,668   | 56,328   | 63,887   | 66,537   | 59,370   | 42,101   | 21,158   | 8,614  | <b>479,320</b> |
| <b>2003/04</b> | 1,184  | 1,312  | 1,003    | 1,907    | 3,142    | 4,592    | 7,752    | 12,128   | 18,395   | 25,615   | 36,247   | 51,442   | 57,145   | 64,457   | 66,929   | 60,188   | 44,532   | 20,670   | 9,201  | <b>487,841</b> |
| <b>2004/05</b> | 1,129  | 1,219  | 921      | 1,916    | 3,182    | 4,378    | 7,399    | 12,266   | 18,552   | 26,484   | 35,853   | 52,007   | 57,535   | 65,363   | 67,623   | 60,113   | 46,503   | 20,655   | 9,470  | <b>492,568</b> |
| <b>2005/06</b> | 1,235  | 1,353  | 939      | 2,086    | 3,353    | 4,708    | 8,097    | 12,529   | 20,018   | 26,933   | 35,967   | 53,710   | 59,382   | 65,948   | 69,595   | 62,708   | 46,510   | 23,446   | 10,071 | <b>508,588</b> |
| <b>2006/07</b> | 1,245  | 1,363  | 1,067    | 1,955    | 3,471    | 4,751    | 7,766    | 12,895   | 19,822   | 27,972   | 37,524   | 53,978   | 61,343   | 64,778   | 70,136   | 63,123   | 46,468   | 24,605   | 9,890  | <b>514,152</b> |
| <b>2007/08</b> | 1,357  | 1,397  | 997      | 2,073    | 3,229    | 5,073    | 7,224    | 12,830   | 20,332   | 28,311   | 36,950   | 50,506   | 64,330   | 64,538   | 69,357   | 64,133   | 46,533   | 26,248   | 10,141 | <b>515,559</b> |
| <b>2008/09</b> | 1,496  | 1,449  | 1,114    | 2,339    | 3,444    | 5,513    | 7,529    | 12,833   | 20,060   | 29,154   | 37,481   | 50,241   | 65,196   | 64,790   | 70,835   | 65,185   | 48,396   | 29,040   | 10,520 | <b>526,615</b> |
| <b>2009/10</b> | 1,560  | 1,470  | 1,015    | 2,299    | 3,513    | 5,629    | 7,568    | 12,379   | 19,836   | 29,198   | 37,563   | 49,028   | 64,901   | 65,298   | 71,000   | 65,643   | 49,907   | 30,608   | 10,806 | <b>529,221</b> |
| <b>2010/11</b> | 1,520  | 1,435  | 1,099    | 2,210    | 3,448    | 5,363    | 7,558    | 11,985   | 19,927   | 29,184   | 37,794   | 48,632   | 64,869   | 65,978   | 70,263   | 67,012   | 51,166   | 31,124   | 12,318 | <b>532,885</b> |
| <b>2011/12</b> | 1,716  | 1,419  | 1,213    | 2,224    | 3,565    | 5,161    | 7,477    | 11,181   | 19,242   | 29,096   | 39,052   | 48,663   | 64,350   | 68,409   | 69,683   | 67,498   | 52,465   | 32,165   | 13,970 | <b>538,549</b> |
| <b>2012/13</b> | 1,620  | 1,412  | 1,386    | 2,266    | 3,623    | 5,165    | 7,602    | 10,937   | 18,916   | 29,003   | 39,706   | 47,675   | 60,346   | 70,447   | 66,183   | 66,269   | 53,437   | 32,054   | 14,385 | <b>532,432</b> |
| <b>2013/14</b> | 1,794  | 1,556  | 1,387    | 2,349    | 3,610    | 5,238    | 8,075    | 10,548   | 18,712   | 29,026   | 40,409   | 49,372   | 59,382   | 72,446   | 67,030   | 66,779   | 53,862   | 32,398   | 15,039 | <b>539,012</b> |
| <b>CHD</b>     |        |        |          |          |          |          |          |          |          |          |          |          |          |          |          |          |          |          |        |                |
| <b>2000/01</b> | 13     | 7      | 5        | 18       | 49       | 154      | 668      | 2,479    | 6,164    | 11,223   | 19,568   | 24,289   | 29,574   | 30,812   | 27,297   | 20,750   | 11,048   | 5,343    | 1,491  | <b>190,952</b> |
| <b>2001/02</b> | 14     | 1      | 3        | 16       | 44       | 185      | 691      | 2,370    | 6,192    | 11,148   | 19,136   | 24,916   | 29,041   | 30,529   | 28,301   | 21,118   | 11,949   | 5,464    | 1,756  | <b>192,874</b> |
| <b>2002/03</b> | 7      | 4      | 2        | 19       | 48       | 173      | 752      | 2,446    | 6,351    | 11,587   | 18,600   | 26,321   | 28,850   | 31,075   | 29,408   | 22,630   | 13,584   | 5,941    | 2,065  | <b>199,863</b> |
| <b>2003/04</b> | 15     | 6      | 2        | 20       | 72       | 187      | 760      | 2,466    | 6,474    | 12,015   | 18,238   | 26,297   | 29,146   | 31,413   | 29,565   | 22,904   | 14,463   | 5,795    | 2,351  | <b>202,189</b> |
| <b>2004/05</b> | 13     | 1      | 2        | 29       | 80       | 172      | 706      | 2,448    | 6,431    | 12,036   | 18,064   | 26,587   | 29,295   | 31,467   | 30,253   | 23,325   | 15,104   | 5,870    | 2,318  | <b>204,201</b> |

|                     |     |    |     |     |     |     |     |       |       |        |        |        |        |        |        |        |        |       |       |                |
|---------------------|-----|----|-----|-----|-----|-----|-----|-------|-------|--------|--------|--------|--------|--------|--------|--------|--------|-------|-------|----------------|
| <b>2005/<br/>06</b> | 24  | 2  | 3   | 29  | 76  | 215 | 753 | 2,432 | 6,647 | 11,645 | 17,377 | 26,504 | 29,370 | 30,926 | 29,818 | 24,159 | 14,697 | 6,752 | 2,497 | <b>203,926</b> |
| <b>2006/<br/>07</b> | 13  | 5  | 1   | 28  | 76  | 192 | 745 | 2,451 | 6,352 | 11,962 | 17,751 | 26,402 | 29,814 | 30,222 | 30,118 | 24,405 | 14,860 | 7,031 | 2,467 | <b>204,895</b> |
| <b>2007/<br/>08</b> | 9   | 3  | 3   | 32  | 107 | 228 | 688 | 2,423 | 6,346 | 11,773 | 17,278 | 24,708 | 30,856 | 29,607 | 29,575 | 24,924 | 15,260 | 7,271 | 2,443 | <b>203,534</b> |
| <b>2008/<br/>09</b> | 16  | 6  | 13  | 22  | 89  | 198 | 648 | 2,204 | 5,993 | 11,418 | 16,867 | 23,977 | 30,373 | 28,511 | 29,613 | 24,923 | 15,259 | 7,828 | 2,547 | <b>200,505</b> |
| <b>2009/<br/>10</b> | 9   | 7  | 5   | 22  | 77  | 195 | 601 | 2,082 | 5,631 | 11,169 | 16,615 | 21,933 | 28,629 | 27,436 | 28,302 | 23,485 | 15,003 | 7,943 | 2,570 | <b>191,714</b> |
| <b>2010/<br/>11</b> | 17  | 7  | 8   | 25  | 77  | 169 | 555 | 1,908 | 5,429 | 10,750 | 16,101 | 21,179 | 27,945 | 26,727 | 27,224 | 23,373 | 15,354 | 7,745 | 2,886 | <b>187,479</b> |
| <b>2011/<br/>12</b> | 21  | 8  | 4   | 25  | 75  | 207 | 531 | 1,746 | 5,251 | 10,655 | 16,462 | 21,319 | 27,418 | 27,509 | 26,383 | 23,534 | 15,825 | 8,037 | 3,240 | <b>188,250</b> |
| <b>2012/<br/>13</b> | 20  | 7  | 10  | 36  | 100 | 155 | 516 | 1,650 | 5,038 | 10,434 | 16,545 | 21,159 | 25,875 | 28,547 | 25,542 | 23,380 | 16,327 | 8,135 | 3,190 | <b>186,666</b> |
| <b>2013/<br/>14</b> | 22  | 3  | 18  | 25  | 87  | 172 | 618 | 1,469 | 4,774 | 10,299 | 16,687 | 21,422 | 25,433 | 28,908 | 25,346 | 23,212 | 15,970 | 7,842 | 3,112 | <b>185,419</b> |
| <b>Stroke</b>       |     |    |     |     |     |     |     |       |       |        |        |        |        |        |        |        |        |       |       |                |
| <b>2000/<br/>01</b> | 87  | 45 | 54  | 88  | 117 | 192 | 335 | 542   | 786   | 1,323  | 2,159  | 2,915  | 4,002  | 5,705  | 7,330  | 8,343  | 6,274  | 4,151 | 1,585 | <b>46,033</b>  |
| <b>2001/<br/>02</b> | 86  | 60 | 35  | 107 | 139 | 247 | 374 | 619   | 874   | 1,303  | 2,238  | 3,047  | 3,952  | 5,565  | 7,108  | 8,293  | 6,716  | 4,287 | 1,688 | <b>46,738</b>  |
| <b>2002/<br/>03</b> | 111 | 52 | 49  | 156 | 120 | 190 | 360 | 603   | 905   | 1,409  | 2,126  | 3,222  | 4,078  | 5,619  | 7,191  | 8,149  | 7,329  | 4,276 | 1,900 | <b>47,845</b>  |
| <b>2003/<br/>04</b> | 113 | 41 | 57  | 116 | 156 | 193 | 332 | 633   | 1,026 | 1,370  | 2,151  | 3,215  | 4,084  | 5,546  | 6,854  | 8,025  | 7,479  | 4,137 | 1,943 | <b>47,471</b>  |
| <b>2004/<br/>05</b> | 119 | 56 | 67  | 105 | 136 | 174 | 319 | 656   | 1,006 | 1,606  | 2,411  | 3,153  | 4,267  | 5,555  | 6,814  | 7,720  | 7,476  | 3,846 | 1,938 | <b>47,424</b>  |
| <b>2005/<br/>06</b> | 129 | 70 | 43  | 115 | 121 | 212 | 356 | 660   | 1,058 | 1,543  | 2,081  | 3,374  | 4,221  | 5,444  | 6,916  | 7,906  | 7,460  | 4,156 | 2,108 | <b>47,973</b>  |
| <b>2006/<br/>07</b> | 115 | 48 | 72  | 98  | 142 | 224 | 374 | 646   | 1,084 | 1,575  | 2,195  | 3,236  | 4,138  | 5,191  | 6,394  | 7,479  | 7,082  | 4,415 | 2,073 | <b>46,581</b>  |
| <b>2007/<br/>08</b> | 138 | 53 | 57  | 97  | 147 | 236 | 290 | 658   | 1,059 | 1,579  | 2,114  | 3,019  | 4,363  | 5,223  | 6,545  | 7,324  | 7,006  | 4,544 | 2,085 | <b>46,537</b>  |
| <b>2008/<br/>09</b> | 152 | 49 | 51  | 93  | 145 | 241 | 322 | 600   | 1,136 | 1,746  | 2,238  | 3,064  | 4,431  | 5,263  | 6,681  | 7,684  | 7,043  | 5,168 | 2,102 | <b>48,209</b>  |
| <b>2009/<br/>10</b> | 128 | 66 | 60  | 113 | 158 | 211 | 329 | 631   | 1,202 | 1,806  | 2,414  | 3,351  | 4,842  | 5,629  | 6,951  | 8,047  | 7,569  | 5,256 | 2,115 | <b>50,878</b>  |
| <b>2010/<br/>11</b> | 135 | 45 | 49  | 112 | 146 | 195 | 349 | 691   | 1,192 | 1,872  | 2,607  | 3,550  | 4,922  | 5,860  | 7,122  | 8,286  | 7,644  | 5,707 | 2,521 | <b>53,005</b>  |
| <b>2011/<br/>12</b> | 124 | 61 | 65  | 111 | 143 | 237 | 364 | 669   | 1,151 | 1,965  | 2,755  | 3,687  | 4,929  | 6,067  | 7,208  | 8,199  | 7,883  | 5,664 | 2,761 | <b>54,043</b>  |
| <b>2012/<br/>13</b> | 130 | 46 | 104 | 82  | 137 | 219 | 332 | 587   | 1,160 | 2,012  | 2,909  | 3,616  | 4,884  | 6,294  | 7,232  | 8,206  | 8,120  | 5,631 | 2,811 | <b>54,512</b>  |

|                     |     |    |    |    |     |     |     |     |       |       |       |       |       |       |       |       |       |       |       |               |
|---------------------|-----|----|----|----|-----|-----|-----|-----|-------|-------|-------|-------|-------|-------|-------|-------|-------|-------|-------|---------------|
| <b>2013/<br/>14</b> | 164 | 61 | 56 | 96 | 146 | 224 | 408 | 612 | 1,202 | 1,978 | 3,016 | 3,683 | 4,601 | 6,337 | 7,135 | 8,012 | 7,931 | 5,615 | 2,888 | <b>54,165</b> |
|---------------------|-----|----|----|----|-----|-----|-----|-----|-------|-------|-------|-------|-------|-------|-------|-------|-------|-------|-------|---------------|

*Notes: Hospital Episode Statistics (HES) include activity ending in the year in question and run from April to March, e.g. 2012-13 includes activity ending between 1st April 2012 and 31st March 2013. A finished admission episode (FAE) is the first period of admitted patient care under one consultant within one healthcare provider. Admissions do not represent the number of patients, as a person may have more than one admission within the period. FAEs are counted against the year or month in which the admission episode finishes.*

*Source: HSCIC (2015). Hospital Episode Statistics (HES). Health and Social Care Information Centre. Leeds.*



## Inpatient episodes by main diagnosis in National Health Service hospitals in women, England 2000/01 to 2013/14

|                | 0 to 4 | 5 to 9 | 10 to 14 | 15 to 19 | 20 to 24 | 25 to 29 | 30 to 34 | 35 to 39 | 40 to 44 | 45 to 49 | 50 to 54 | 55 to 59 | 60 to 64 | 65 to 69 | 70 to 74 | 75 to 79 | 80 to 84 | 85 to 89 | 90+    | All ages       |   |
|----------------|--------|--------|----------|----------|----------|----------|----------|----------|----------|----------|----------|----------|----------|----------|----------|----------|----------|----------|--------|----------------|---|
| <b>CVD</b>     |        |        |          |          |          |          |          |          |          |          |          |          |          |          |          |          |          |          |        |                |   |
| <b>2000/01</b> | 771    | 854    | 1,020    | 1,304    | 2,494    | 5,067    | 8,388    | 10,489   | 11,839   | 14,777   | 21,223   | 24,101   | 29,978   | 37,783   | 45,976   | 53,114   | 45,046   | 36,543   | 19,900 | <b>370,667</b> |   |
| <b>2001/02</b> | 784    | 784    | 1,118    | 1,295    | 2,472    | 4,491    | 7,853    | 10,239   | 11,885   | 14,474   | 20,033   | 24,246   | 28,616   | 36,139   | 44,794   | 51,018   | 46,355   | 35,629   | 20,777 | <b>363,002</b> |   |
| <b>2002/03</b> | 826    | 853    | 1,194    | 1,285    | 2,738    | 4,628    | 8,171    | 11,230   | 13,168   | 15,490   | 20,231   | 25,954   | 29,464   | 36,774   | 46,039   | 51,307   | 49,710   | 36,275   | 22,792 | <b>378,129</b> |   |
| <b>2003/04</b> | 867    | 831    | 1,175    | 1,495    | 3,262    | 4,594    | 7,825    | 11,087   | 13,270   | 15,538   | 19,541   | 26,576   | 29,823   | 37,849   | 45,869   | 51,355   | 52,020   | 34,484   | 23,380 | <b>380,841</b> |   |
| <b>2004/05</b> | 938    | 754    | 1,158    | 1,384    | 3,031    | 4,545    | 7,588    | 10,538   | 13,276   | 15,222   | 18,947   | 25,855   | 29,451   | 38,323   | 45,363   | 51,513   | 53,336   | 33,709   | 24,359 | <b>379,290</b> |   |
| <b>2005/06</b> | 917    | 888    | 1,116    | 1,716    | 3,155    | 4,872    | 7,489    | 11,086   | 14,373   | 16,152   | 19,375   | 26,662   | 30,216   | 38,753   | 46,444   | 52,377   | 51,585   | 36,488   | 24,995 | <b>388,659</b> |   |
| <b>2006/07</b> | 1,035  | 816    | 1,087    | 1,679    | 3,214    | 5,121    | 7,283    | 11,294   | 14,380   | 16,608   | 19,997   | 26,924   | 30,991   | 37,960   | 45,894   | 52,847   | 49,221   | 36,760   | 23,968 | <b>387,079</b> |   |
| <b>2007/08</b> | 1,089  | 854    | 1,127    | 1,749    | 3,288    | 5,278    | 7,169    | 10,753   | 14,430   | 17,582   | 20,143   | 25,698   | 33,489   | 37,352   | 45,536   | 52,032   | 48,603   | 38,745   | 24,389 | <b>389,306</b> |   |
| <b>2008/09</b> | 2,282  | 1,707  | 2,437    | 3,705    | 6,986    | 10,973   | 14,164   | 21,978   | 29,855   | 36,734   | 40,461   | 49,313   | 66,958   | 75,079   | 92,383   | 105,056  | 99,826   | 84,999   | 48,447 | <b>793,343</b> |   |
| <b>2009/10</b> | -      | -      | -        | -        | -        | -        | -        | -        | -        | -        | -        | -        | -        | -        | -        | -        | -        | -        | -      | -              | - |
| <b>2010/11</b> | 1,152  | 981    | 1,248    | 1,872    | 3,569    | 5,458    | 7,052    | 10,326   | 14,531   | 18,648   | 20,854   | 24,553   | 33,092   | 37,859   | 45,829   | 52,659   | 50,653   | 42,343   | 27,107 | <b>399,786</b> |   |
| <b>2011/12</b> | 1,117  | 971    | 1,288    | 1,795    | 3,486    | 5,175    | 6,787    | 9,266    | 13,704   | 17,789   | 20,815   | 24,026   | 32,690   | 38,055   | 45,587   | 51,654   | 52,214   | 42,266   | 28,432 | <b>397,117</b> |   |
| <b>2012/13</b> | 1,265  | 1,110  | 1,315    | 1,901    | 3,422    | 5,091    | 6,662    | 8,321    | 12,906   | 17,484   | 20,583   | 23,340   | 29,993   | 38,856   | 43,780   | 50,395   | 51,283   | 41,421   | 29,875 | <b>389,003</b> |   |
| <b>2013/14</b> | 1,368  | 1,141  | 1,379    | 1,879    | 3,520    | 5,211    | 6,965    | 8,670    | 12,732   | 17,443   | 21,621   | 24,529   | 29,893   | 40,994   | 43,839   | 51,191   | 51,590   | 41,027   | 29,764 | <b>394,756</b> |   |
| <b>CHD</b>     |        |        |          |          |          |          |          |          |          |          |          |          |          |          |          |          |          |          |        |                |   |
| <b>2000/01</b> | 5      | 2      | 4        | 3        | 25       | 34       | 193      | 595      | 1,670    | 3,322    | 6,084    | 8,085    | 11,635   | 14,586   | 16,245   | 15,657   | 12,062   | 8,273    | 3,812  | <b>102,292</b> |   |
| <b>2001/02</b> | 3      | 2      | 1        | 9        | 36       | 61       | 218      | 631      | 1,704    | 3,256    | 5,683    | 8,287    | 11,050   | 14,124   | 16,398   | 15,477   | 12,470   | 8,406    | 4,055  | <b>101,871</b> |   |



|                     |     |    |    |    |     |     |     |     |       |       |       |       |       |       |       |       |       |       |       |               |
|---------------------|-----|----|----|----|-----|-----|-----|-----|-------|-------|-------|-------|-------|-------|-------|-------|-------|-------|-------|---------------|
| <b>2010/<br/>11</b> | 107 | 54 | 71 | 92 | 158 | 230 | 310 | 571 | 992   | 1,525 | 1,918 | 2,207 | 3,090 | 3,845 | 5,387 | 7,311 | 9,401 | 9,532 | 6,903 | <b>53,704</b> |
| <b>2011/<br/>12</b> | 92  | 62 | 64 | 94 | 157 | 199 | 347 | 519 | 1,098 | 1,640 | 1,880 | 2,297 | 3,053 | 3,835 | 5,543 | 7,440 | 9,269 | 9,385 | 7,317 | <b>54,291</b> |
| <b>2012/<br/>13</b> | 112 | 75 | 66 | 83 | 142 | 249 | 326 | 516 | 973   | 1,536 | 2,002 | 2,274 | 3,088 | 4,011 | 5,308 | 7,442 | 9,413 | 9,093 | 7,636 | <b>54,345</b> |
| <b>2013/<br/>14</b> | 141 | 72 | 72 | 81 | 159 | 211 | 349 | 564 | 962   | 1,572 | 2,056 | 2,250 | 2,987 | 4,255 | 5,339 | 7,340 | 9,196 | 8,691 | 7,593 | <b>53,890</b> |

*Notes: Data for 2009/10 are not available. Hospital Episode Statistics (HES) include activity ending in the year in question and run from April to March, e.g. 2012-13 includes activity ending between 1st April 2012 and 31st March 2013. A finished admission episode (FAE) is the first period of admitted patient care under one consultant within one healthcare provider. Admissions do not represent the number of patients, as a person may have more than one admission within the period. FAEs are counted against the year or month in which the admission episode finishes. Excluding day cases.*

*Source: HSCIC (2015). Hospital Episode Statistics (HES). Health and Social Care Information Centre. Leeds.*

***Prescriptions used in the prevention and treatment of cardiovascular disease, England 1981 to 2014***

| Prescriptions                                              | Thousands (000s) |        |        |        |        |        |        |        |        |        |        |        |        |        |
|------------------------------------------------------------|------------------|--------|--------|--------|--------|--------|--------|--------|--------|--------|--------|--------|--------|--------|
|                                                            | 1981             | 1986   | 1991   | 1996   | 2001   | 2006   | 2007   | 2008   | 2009   | 2010   | 2011   | 2012   | 2013   | 2014   |
| Digoxin and other positive inotropic drugs (2.1)           | 4,243            | 3,722  | 3,822  | 3,871  | 4,031  | 4,126  | 4,141  | 4,149  | 4,119  | 4,088  | 4,006  | 3,900  | 3,770  | 3,634  |
| Diuretics (2.2)                                            | 20,678           | 21,996 | 22,195 | 23,106 | 30,203 | 37,582 | 37,355 | 37,536 | 37,511 | 37,687 | 37,563 | 37,258 | 36,650 | 36,208 |
| Anti-arrhythmic drugs (2.3)                                | 232              | 334    | 532    | 840    | 1,292  | 1,265  | 1,247  | 1,226  | 1,188  | 1,174  | 1,156  | 1,129  | 1,107  | 1,088  |
| Beta-adrenoreceptor blocking drugs (2.4)                   | 9,827            | 12,525 | 14,282 | 14,375 | 20,439 | 27,378 | 26,810 | 27,634 | 28,529 | 29,686 | 30,924 | 32,355 | 33,597 | 34,859 |
| Antihypertensive and heart failure drugs (2.5)             | 4,912            | 4,424  | 6,431  | 12,125 | 25,047 | 47,742 | 53,634 | 57,823 | 60,838 | 63,571 | 65,449 | 67,184 | 68,652 | 70,071 |
| Nitrates, calcium blockers & other antianginal drugs (2.6) | 5,156            | 10,314 | 16,718 | 21,971 | 26,814 | 34,707 | 37,214 | 39,100 | 40,575 | 42,043 | 43,086 | 44,675 | 45,868 | 46,992 |
| Anticoagulants and protamine (2.8)                         | 629              | 900    | 1,356  | 2,609  | 4,609  | 6,790  | 7,309  | 7,991  | 8,546  | 9,157  | 9,773  | 10,723 | 11,906 | 13,173 |
| Antiplatelet drugs (2.9)                                   | 281              | 1,058  | 3,619  | 9,002  | 18,891 | 32,779 | 35,382 | 38,124 | 39,107 | 38,182 | 38,351 | 38,603 | 38,661 | 38,443 |

|                                                                        |               |               |               |               |                |                |                |                |                |                |                |                |                |                |
|------------------------------------------------------------------------|---------------|---------------|---------------|---------------|----------------|----------------|----------------|----------------|----------------|----------------|----------------|----------------|----------------|----------------|
| Anti-fibrinolytic drugs<br>and haemostatics<br>(2.11)                  |               |               |               |               | 282            | 327            | 352            | 358            | 363            | 373            | 392            | 396            | 393            | 408            |
| Lipid-lowering drugs<br>(2.12)                                         | 295           | 247           | 1,066         | 3,138         | 13,523         | 42,098         | 47,412         | 52,190         | 56,452         | 59,550         | 61,649         | 64,399         | 66,795         | 68,436         |
| <b>All prescriptions for<br/>disease of the<br/>circulatory system</b> | <b>46,252</b> | <b>55,520</b> | <b>70,022</b> | <b>91,037</b> | <b>145,131</b> | <b>234,793</b> | <b>250,855</b> | <b>266,130</b> | <b>277,244</b> | <b>285,530</b> | <b>292,370</b> | <b>300,647</b> | <b>307,424</b> | <b>313,342</b> |

*Notes: The data up to 1990 are not consistent with data from 1991 onwards. Figures up to 1990 are based on fees and on a sample of 1 in 200 prescriptions dispensed by community pharmacists and appliance contractors only. Figures from 1991 are based on items and cover all prescriptions dispensed by community pharmacists, appliance contractors, dispensing doctors and prescriptions submitted by prescribing doctors for items personally administered. British National Formulary (BNF) codes in parentheses.*

*Source: Office for National Statistics (2015). Prescription cost analysis 2014. Health and Social Care Information Centre, and previous editions.*

### ***Prescriptions used in the prevention and treatment of cardiovascular disease, Wales 2005 to 2014***

| <b>Prescriptions</b>                                           | <b>Thousands (000s)</b> |               |               |               |               |               |               |               |               |               |
|----------------------------------------------------------------|-------------------------|---------------|---------------|---------------|---------------|---------------|---------------|---------------|---------------|---------------|
|                                                                | <b>2005</b>             | <b>2006</b>   | <b>2007</b>   | <b>2008</b>   | <b>2009</b>   | <b>2010</b>   | <b>2011</b>   | <b>2012</b>   | <b>2013</b>   | <b>2014</b>   |
| Digoxin and other positive inotropic drugs (2.1)               | 362                     | 357           | 337           | 319           | 307           | 296           | 284           | 273           | 259           | 249           |
| Diuretics (2.2)                                                | 3,083                   | 3,091         | 3,028         | 3,000         | 2,979         | 2,971         | 2,960         | 2,940         | 2,897         | 2,860         |
| Anti-arrhythmic drugs (2.3)                                    | 99                      | 94            | 87            | 81            | 75            | 68            | 64            | 62            | 60            | 60            |
| Beta-adrenoreceptor blocking drugs (2.4)                       | 2,093                   | 2,110         | 2,071         | 2,116         | 2,165         | 2,237         | 2,322         | 2,424         | 2,505         | 2,584         |
| Antihypertensive and heart failure drugs (2.5)                 | 3,442                   | 3,774         | 4,124         | 4,402         | 4,601         | 4,781         | 4,920         | 5,063         | 5,173         | 5,290         |
| Nitrates, calcium blockers & other antianginal drugs (2.6)     | 2,731                   | 2,892         | 3,032         | 3,135         | 3,205         | 3,263         | 3,314         | 3,390         | 3,437         | 3,488         |
| Anticoagulants and protamine (2.8)                             | 576                     | 612           | 650           | 689           | 723           | 764           | 808           | 874           | 944           | 1,030         |
| Antiplatelet drugs (2.9)                                       | 2,563                   | 2,716         | 2,846         | 3,011         | 3,045         | 2,933         | 2,905         | 2,890         | 2,859         | 2,816         |
| Anti-fibrinolytic drugs and haemostatics (2.11)                | 23                      | 24            | 28            | 30            | 30            | 31            | 33            | 34            | 33            | 33            |
| Lipid-lowering drugs (2.12)                                    | 3,103                   | 3,626         | 3,985         | 4,297         | 4,562         | 4,693         | 4,788         | 4,956         | 5,076         | 5,149         |
| <b>All prescriptions for disease of the circulatory system</b> | <b>18,073</b>           | <b>19,296</b> | <b>20,188</b> | <b>21,082</b> | <b>21,691</b> | <b>22,037</b> | <b>22,399</b> | <b>22,906</b> | <b>23,247</b> | <b>23,570</b> |

*Notes: British National Formulary (BNF) codes in parentheses.*

*Source: Health Statistics and Analysis Unit (2015). Prescription cost analysis 2014. Welsh Government: Cardiff and previous editions.*

**Prescriptions used in the prevention and treatment of cardiovascular disease, Scotland 2001/02 to 2014/15**

| Prescriptions                                                  | Thousands (000s) |               |               |               |               |               |               |               |               |               |               |
|----------------------------------------------------------------|------------------|---------------|---------------|---------------|---------------|---------------|---------------|---------------|---------------|---------------|---------------|
|                                                                | 2001/02          | 2005/06       | 2006/07       | 2007/08       | 2008/09       | 2009/10       | 2010/11       | 2011/12       | 2012/13       | 2013/14       | 2014/15       |
| Digoxin and other positive inotropic drugs (2.1)               | 358              | 323           | 315           | 305           | 296           | 291           | 283           | 276           | 269           | 260           | 252           |
| Diuretics (2.2)                                                | 3,469            | 3,914         | 3,810         | 3,680         | 3,597         | 3,544         | 3,457         | 3,382         | 3,269         | 3,154         | 3,057         |
| Anti-arrhythmic drugs (2.3)                                    | 102              | 90            | 85            | 81            | 77            | 73            | 70            | 71            | 69            | 68            | 67            |
| Beta-adrenoreceptor blocking drugs (2.4)                       | 2,508            | 3,027         | 2,940         | 2,853         | 2,850         | 2,883         | 2,909         | 2,957         | 2,998         | 3,048         | 3,102         |
| Antihypertensive and heart failure drugs (2.5)                 | 2,298            | 3,777         | 4,127         | 4,462         | 4,693         | 4,875         | 4,965         | 5,045         | 5,095         | 5,160         | 5,220         |
| Nitrates, calcium blockers & other antianginal drugs (2.6)     | 3,278            | 3,542         | 3,625         | 3,666         | 3,683         | 3,714         | 3,697         | 3,699         | 3,716         | 3,735         | 3,788         |
| Anticoagulants and protamine (2.8)                             | 489              | 612           | 646           | 676           | 707           | 743           | 773           | 819           | 884           | 958           | 1,035         |
| Antiplatelet drugs (2.9)                                       | 2,461            | 3,448         | 3,545         | 3,652         | 3,743         | 3,724         | 3,577         | 3,506         | 3,404         | 3,295         | 3,218         |
| Anti-fibrinolytic drugs and haemostatics (2.11)                | 35               | 36            | 38            | 39            | 41            | 42            | 43            | 44            | 47            | 47            | 47            |
| Lipid-lowering drugs (2.12)                                    | 1,667            | 3,649         | 4,081         | 4,376         | 4,624         | 4,826         | 4,875         | 4,861         | 4,907         | 4,977         | 5,024         |
| <b>All prescriptions for disease of the circulatory system</b> | <b>16,667</b>    | <b>22,418</b> | <b>23,212</b> | <b>23,791</b> | <b>24,312</b> | <b>24,716</b> | <b>24,649</b> | <b>24,660</b> | <b>24,657</b> | <b>24,703</b> | <b>24,764</b> |

Notes: British National Formulary (BNF) codes in parentheses.

Source: ISD Scotland (2015). Prescription Cost Analysis 2014/15. NHS National Services: Edinburgh and previous editions.

**Prescriptions used in the prevention and treatment of cardiovascular disease, Northern Ireland 2000 to 2014**

| Prescriptions                                                  | Thousands (000s) |              |              |              |              |              |              |              |              |              |              |
|----------------------------------------------------------------|------------------|--------------|--------------|--------------|--------------|--------------|--------------|--------------|--------------|--------------|--------------|
|                                                                | 2000             | 2005         | 2006         | 2007         | 2008         | 2009         | 2010         | 2011         | 2012         | 2013         | 2014         |
| Digoxin and other positive inotropic drugs (2.1)               | 132              | 107          | 104          | 101          | 99           | 96           | 95           | 93           | 92           | 90           | 87           |
| Diuretics (2.2)                                                | 819              | 1,015        | 1,009        | 992          | 983          | 983          | 992          | 1,002        | 996          | 978          | 960          |
| Anti-arrhythmic drugs (2.3)                                    | 41               | 38           | 36           | 35           | 34           | 32           | 31           | 32           | 31           | 30           | 29           |
| Beta-adrenoreceptor blocking drugs (2.4)                       | 641              | 908          | 918          | 915          | 937          | 967          | 1,020        | 1,059        | 1,108        | 1,150        | 1,189        |
| Antihypertensive and heart failure drugs (2.5)                 | 602              | 1,145        | 1,247        | 1,364        | 1,445        | 1,517        | 1,595        | 1,640        | 1,689        | 1,728        | 1,770        |
| Nitrates, calcium blockers & other antianginal drugs (2.6)     | 928              | 1,001        | 1,039        | 1,080        | 1,089        | 1,097        | 1,124        | 1,154        | 1,188        | 1,218        | 1,233        |
| Anticoagulants and protamine (2.8)                             | 138              | 183          | 194          | 207          | 220          | 233          | 249          | 274          | 300          | 334          | 365          |
| Antiplatelet drugs (2.9)                                       | 539              | 957          | 1,026        | 1,095        | 1,151        | 1,177        | 1,192        | 1,223        | 1,239        | 1,239        | 1,228        |
| Anti-fibrinolytic drugs and haemostatics (2.11)                | 0                | 12           | 12           | 13           | 13           | 14           | 14           | 16           | 17           | 16           | 16           |
| Lipid-lowering drugs (2.12)                                    | 376              | 1,047        | 1,227        | 1,393        | 1,534        | 1,652        | 1,761        | 1,838        | 1,901        | 1,954        | 1,988        |
| <b>All prescriptions for disease of the circulatory system</b> | <b>4,226</b>     | <b>6,413</b> | <b>6,812</b> | <b>7,195</b> | <b>7,505</b> | <b>7,769</b> | <b>8,073</b> | <b>8,331</b> | <b>8,560</b> | <b>8,736</b> | <b>8,869</b> |

Notes: British National Formulary (BNF) codes in parentheses.

Source: HSC (2015). Prescription Cost Analysis 2014. Business Services Organisation: Belfast.
